# Supplementary material
Source: publisher site journal article supplement (https://zse.pensoft.net/article/61351/download/suppl/32/)
Supplement: Supplementary file 1

## Sheet: Sheet1
	Pedioplanis mayeri sp. nov.		P. rubens		Pedioplanis branchi sp. nov.		P. gaerdesi		P. undata		P. inornata
	Female (n = 6)	Male (n = 7)	Female (n = 6)	Male (n = 4)	Female (n = 5)	Male (n = 15)	Female (n = 13)	Male (n = 8)	Female (n = 9)	Male (n = 2)	Female (n = 7)	Male (n = 15)
SVL	40.7–57	40.2–58	42–45	42–46	42.5–48	40–49.1	43–51	45–52.6	41.6–53	44.7–48	43–52	42.1–54
BL	24.4–38.8	25.9–36.9	26–28.9	26.9–28.5	25.6–29.6	23.6–31.3	26.5–32.5	27.9–32.8	25.7–35.3	27.5–30.2	26–32	24.6–32.7
CSL	15.9–18.7	15.9–21.3	15.4–17	15.1–17.7	16.1–18.4	15–19.3	15.7–20.2	16.6–20.9	15.4–18.5	16.8–17.8	15.9–20	15.7–21.3
HL	10.5–12.3	10.3–14.8	9.9–10.5	10–10.9	10.6–11.1	9.6–11.8	10.3–13.1	10.8–13.3	10.2–11.6	10.5–11.7	10.2–11.7	10.1–13.3
HW	5.7–7.5	5.5–8	6–6.5	6–7.2	6.5–6.9	5.6–7.3	5.7–8.9	5.8–7.6	5.2–7.1	5.9–7.2	6.3–7.5	6.2–8.2
JL	8.5–13	8.5–12.8	10.3–11	10.8–11.8	11.3–12.1	9.3–12.8	9.2–12.7	9.5–11	8.2–12.6	9.5–12.9	10.4–12.5	9.8–13.9
FiL	4.7–5.7	4.7–6.1	4.8–5.4	4.9–6	5.2–5.9	4–6.1	4.8–7	4.1–6.2	4–6.1	5.9–6.4	4–6.2	4.5–6.5
ToL	8.2–11.5	9.8–12.8	8.6–10.2	9.6–10.3	10–11.1	9–11.5	9.9–13	9.2–12	7.8–11.1	10.6–11.8	9–10.8	7–12
IL	18.5–31.6	17.4–27.9	16.5–19	17.4–18.8	17.7–20.3	15.5–20.8	18.8–23.3	19.3–24	17.1–23.4	20–20.7	17.8–23	17.2–24
HiL	7.4–10.9	7.8–11.5	6.5–7.7	7.1–8.1	8.1–9.6	7.1–10	8.5–12.1	8.2–11.6	7.7–9.6	9–9.1	8–9.1	8.2–10.9
FoL	4.7–6.8	5.1–7.8	3.8–4.7	3.9–4.7	4.3–6	3.8–5.7	4.3–7.3	6.1–7.8	4.3–6.4	5.1–6.1	4–6.5	5–7.7
TaL	74.9–116.7 (n = 4)	95–131.8 (n = 6)	64.5–91.4 (n = 4)	93–106.5 (n = 3)	88.4–111.2 (n = 3)	92.3–99 (n = 4)	87.4–128 (n = 5)	97–126 (n = 5)	93.2–111 (n = 6)	96.2–116	96–117 (n = 2)	103–127 (n = 10)
